# Supplementary material
Source: Springer Nature journal article supplement (https://www.springermedizin.de/resource/supplementary/12885_2005_456_MOESM5_ESM.pdf/9469490)

**1635\_at P=0.0017**

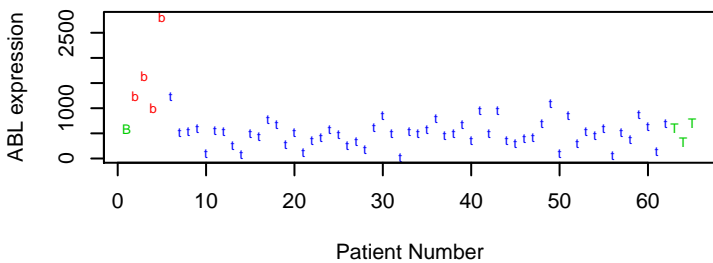

**1636\_g\_at P=0.00033**

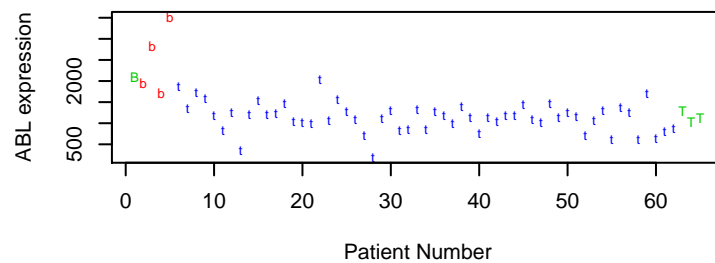

**1656\_s\_at P=0.056**

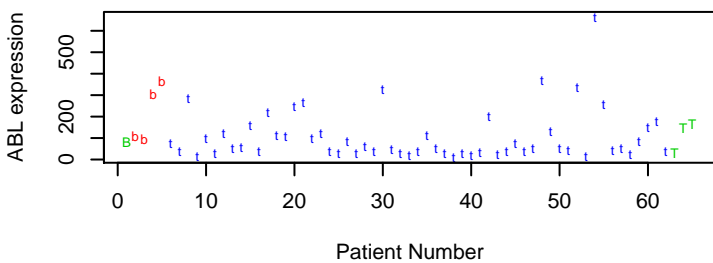

**2040\_s\_at P=0.35**

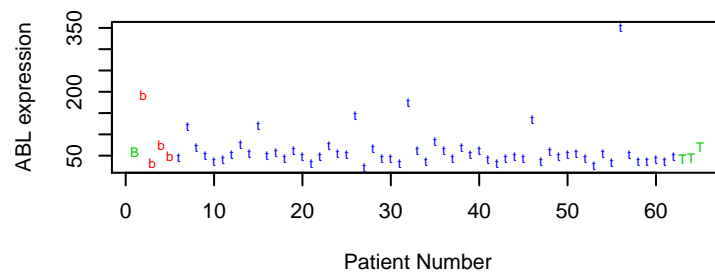

**2041\_i\_at P=0.57**

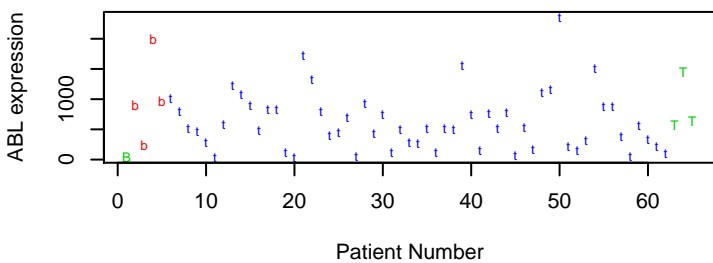

**32974\_at P=0.53**

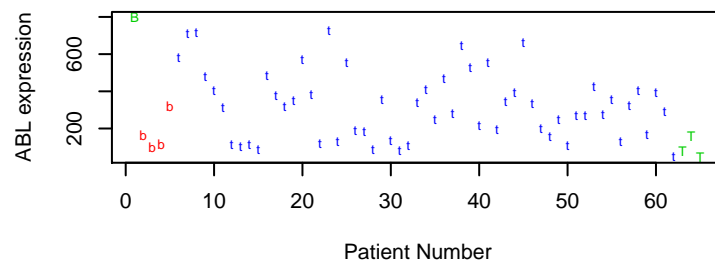

**32975\_g\_at P=0.38**

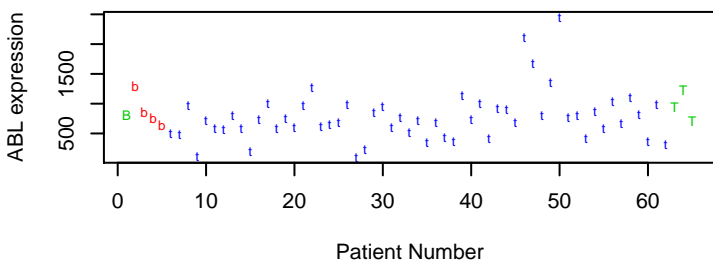

**39730\_at P=0.00033**

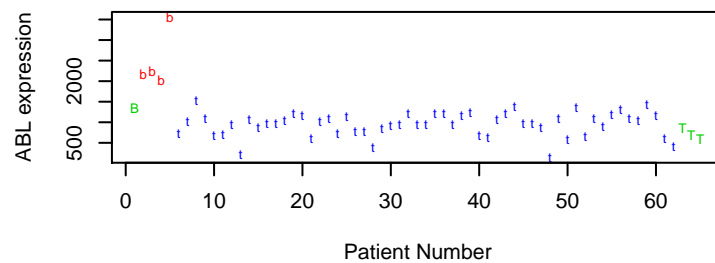

Supplement: MOESM5 [file 9469490]
